# Supplementary material for: Ocean warming is the key filter for successful colonization of the migrant octocoral Melithaea erythraea (Ehrenberg, 1834) in the Eastern Mediterranean Sea
Source: PeerJ. 2020 Jun 24;8:e9355. doi: 10.7717/peerj.9355 (PMC7320722; doi:10.7717/peerj.9355)
Supplement: Supplemental Information 4 [file peerj-08-9355-s004.xlsx]

## Sheet: SST
https://www.seatemperature.org/
	Mediterranean (Tel Aviv station)			Northern Red Sea (Aqaba)
Month	Min (°C)	Max (°C)	Average (°C)	Min (°C)	Max (°C)	Average (°C)				Temp (°C)/Month
1	17	20.3	18.6	20.3	23.4	21.8					1	2	3	4	5	6	7	8	9	10	11	12
2	16.5	18.5	17.5	20.1	21.5	20.8			MED	Max	20.3	18.5	18.6	20	23.7	26.7	29.2	29.3	28.8	28.3	25.6	22
3	16.7	18.6	17.6	20.3	21.6	20.9				Average	18.6	17.5	17.6	18.4	21.2	24.8	27.3	28.5	28.1	26.1	23	20.5
4	16.8	20	18.4	20.5	22.9	21.7				Min	17	16.5	16.7	16.8	18.8	22.9	25.5	27.7	27.4	24	20.4	19
5	18.8	23.7	21.2	22.2	25.2	23.7
6	22.9	26.7	24.8	24.9	27.6	26.2			RED	Max	23.4	21.5	21.6	22.9	25.2	27.6	29.9	30.1	29.2	29	27.4	24.8
7	25.5	29.2	27.3	26.8	29.9	28.3				Average	21.8	20.8	20.9	21.7	23.7	26.2	28.3	29.2	28.4	27.4	24.9	23.1
8	27.7	29.3	28.5	28.3	30.1	29.2				Min	20.3	20.1	20.3	20.5	22.2	24.9	26.8	28.3	27.6	25.9	22.5	21.5
9	27.4	28.8	28.1	27.6	29.2	28.4
10	24	28.3	26.1	25.9	29	27.4
11	20.4	25.6	23	22.5	27.4	24.9
12	19	22	20.5	21.5	24.8	23.1
ADCP-Temperature from Hadera Marine Monitoring Station (IOLR):
link
T (°C)/year	1994	1995	1996	1997	1998	1999	2000	2001	2002	2003	2004	2005	2006	2007	2008	2009	2010	2011	2012	2013	2014	2015	2016	2017	2018	Mean
15	0	0	0	0	0	0	0	0	0	0	0	0	0	0	0	0	0	0	29	0	0	0	0	0	0	1.16
15.5	0	0	0	0	0	0	16	0	1	28	0	0	0	0	0	0	0	0	171	0	0	0	0	0	0	8.64
16	0	15	0	4	0	0	398	0	35	197	56	23	0	2	36	0	0	0	537	0	0	72	0	4	0	55.16
16.5	25	82	69	132	22	0	326	0	21	262	406	214	165	28	155	3	0	0	475	0	0	175	0	24	0	103.36
17	400	449	582	1024	456	24	646	0	463	357	931	349	626	198	465	187	0	34	528	0	1	363	82	720	0	355.4
17.5	625	660	635	553	1106	410	379	100	851	588	339	852	671	1399	567	740	135	300	450	3	87	443	667	562	25	525.88
18	276	804	342	414	592	1081	219	564	417	318	573	739	592	657	256	702	543	665	223	2	649	585	555	576	206	502
18.5	453	680	358	239	195	362	164	466	401	415	306	357	515	290	212	442	634	622	290	43	1380	583	630	518	302	434.28
19	371	296	95	343	220	450	313	349	399	422	416	97	228	280	242	199	532	541	408	386	451	499	363	247	644	351.64
19.5	183	307	48	615	133	435	324	710	395	506	182	87	224	210	421	156	449	708	289	1268	184	300	410	166	617	373.08
20	141	202	210	171	302	155	523	445	195	301	217	196	345	139	463	343	194	736	228	840	271	263	284	157	393	308.56
20.5	278	193	304	149	273	489	345	361	195	88	401	216	243	248	265	214	111	365	114	457	219	309	378	176	487	275.12
21	316	182	264	134	121	235	288	244	146	97	300	194	166	294	361	95	251	214	113	397	124	235	195	149	355	218.8
21.5	171	99	387	148	216	139	332	179	217	139	230	598	118	251	245	261	210	262	102	63	343	234	151	359	199	226.12
22	124	176	180	222	193	127	246	239	140	116	163	248	179	108	142	206	190	314	53	129	414	178	250	461	161	198.36
22.5	86	180	75	232	139	201	246	282	258	299	129	304	182	164	184	142	189	142	85	275	86	213	293	243	179	192.32
23	59	107	79	364	270	162	172	276	192	271	66	256	259	156	263	125	194	71	29	354	96	222	157	240	227	186.68
23.5	48	100	126	298	239	138	104	133	264	192	130	187	291	141	270	130	317	91	29	446	140	246	242	237	92	185.24
24	89	148	236	176	263	187	257	93	178	260	161	224	125	74	74	248	144	61	32	321	428	263	164	125	143	178.96
24.5	53	109	289	187	147	275	109	265	215	153	197	48	110	235	74	207	417	182	78	329	216	222	167	139	197	184.8
25	112	233	170	263	282	223	105	189	98	253	103	55	59	109	128	146	182	274	48	292	233	210	177	173	207	172.96
25.5	221	247	277	249	488	109	78	173	233	220	228	131	46	301	219	182	156	249	40	315	151	351	143	168	318	211.72
26	132	109	337	203	150	218	309	248	249	224	369	183	38	286	228	273	210	288	119	228	249	399	192	208	261	228.4
26.5	117	86	392	336	74	180	228	136	527	293	445	135	90	45	309	455	171	242	246	203	285	321	217	252	333	244.72
27	130	68	101	190	118	375	305	311	212	270	460	202	215	139	171	241	140	377	314	358	227	365	316	262	410	251.08
27.5	43	131	128	570	316	343	262	437	197	305	428	185	480	226	237	176	48	287	196	420	287	521	373	225	700	300.84
28	157	143	351	273	490	501	398	223	398	318	389	425	548	257	542	325	97	442	396	350	307	333	458	471	683	371
28.5	561	339	573	233	330	425	478	585	373	479	400	557	435	151	664	491	173	331	393	390	478	189	520	575	201	412.96
29	431	663	538	513	282	478	498	478	397	427	340	373	326	106	471	506	338	551	322	300	596	181	549	543	65	410.88
29.5	249	461	413	119	265	590	523	502	353	497	70	231	161	8	175	370	237	246	352	213	515	176	261	408	14	296.36
30	2	129	7	0	340	269	192	312	449	219	0	2	77	0	7	97	138	85	511	56	116	200	116	144	3	138.84
30.5	0	7	0	0	288	122	0	121	182	158	0	0	0	0	0	1	92	0	355	0	5	63	37	7	0	57.52
31	0	0	0	0	85	0	0	0	15	0	0	0	0	0	0	0	53	0	4	0	0	1	0	0	0	6.32
31.5	0	0	0	0	0	0	0	0	0	0	0	0	0	0	0	0	0	0	0	0	0	0	0	0	0	0
32	0	0	0	0	0	0	0	0	0	0	0	0	0	0	0	0	0	0	0	0	0	0	0	0	0	0
sum:	2474	3495	2339	3495	3026	2917	3308	2634	3178	3394	3426	2914	3366	3203	2817	2772	2487	3606	3628	2542	3023	3283	2991	2974	2187	1985.88

## Sheet: Isotopes
	d 13C/12C		d 18O/16O		T (°C)	T (°C)	Metabolic
	Corr. (‰)	SD	Corr. (‰)	SD	Friedman & O'Neil (1977)	Hays & Grossman (1991)	carbon (%)
					synthetic calcite	equation no. (2)
Ha02	-0.378472	0.0176918	0.399745	0.0289534	20.7498	20.6412	13.2137
Ha02	-0.382539	0.098661	0.262219	0.0630024	21.3909	21.2909	13.2363
Ha16	-1.33623	0.0352746	0.217149	0.029129	21.5749	21.4774	18.5346
Ha16	-1.42392	0.0220273	0.197583	0.0296479	21.667	21.5708	19.0218
Na16	-1.11522	0.015566	-1.08746	0.0242961	27.8012	27.7974	17.3068
Na16	-1.36964	0.0442188	-1.05121	0.0502573	27.6051	27.5983	18.7202
Na17	-1.24439	0.0262679	0.434241	0.051761	20.613	20.5026	18.0244
Na17	-1.07335	0.0339971	0.292274	0.0139356	21.2532	21.1513	17.0742
Eilat	-0.279237	0.018363	0.344402	0.0446453	22.8697	22.7936	12.6624
Eilat	-0.227333	0.0204034	0.323425	0.019321	22.963	22.8884	12.3741
A.Bis Eilat	0.299351	0.0327292	0.0235367	0.0263002	24.3737	24.3209	9.44805
A.Bis Eilat	0.202292	0.029754	-0.0043539	0.0608465	24.4685	24.4172	9.98727
18	8
17.5	18
30	18

## Sheet: Morphometry
	Length (μm)							Width (μm)							Length to width ratio
	site							site							site
#	Nahsholim 2016	Hadera 2016	Hadera 2002	Eilat 2017	Nahsholim 2017	M. biserialis		Nahsholim 2016	Hadera 2016	Hadera 2002	Eilat 2017	Nahsholim 2017	M. biserialis		Nahsholim 2016	Hadera 2016	Hadera 2002	Eilat 2017	Nahsholim 2017	M. biserialis
1	225	172	198	225	203	132		54.6	51.7	35.2	94	33.2	21.9		4.12088	3.32689	5.625	2.39362	6.11446	6.0274
2	150	85.3	146	178	151	66.9		30.7	29.8	30.6	44.3	42	32.6		4.88599	2.86242	4.77124	4.01806	3.59524	2.05215
3	188	105	136	165	174	113		34.4	41	41.7	67.6	23.3	37.8		5.46512	2.56098	3.26139	2.44083	7.46781	2.98942
4	139	65.8	170	219	185	149		50.7	25.1	37.2	52	20.3	14.8		2.74162	2.62151	4.56989	4.21154	9.1133	10.0676
5	114	110	223	214	135	69.9		28.7	38.8	34.3	41.7	34.8	44.9		3.97213	2.83505	6.50146	5.13189	3.87931	1.55679
6	127	258	171	110	133	187		40.2	39.7	42.4	82.9	28.2	35.6		3.1592	6.49874	4.03302	1.3269	4.71631	5.25281
7	315	113	118	193	146	179		37.3	22	37.6	47.5	26.9	32.4		8.44504	5.13636	3.1383	4.06316	5.42751	5.52469
8	107	162	181	181	184	158		31.2	50.9	29.2	68.3	31.9	30.9		3.42949	3.18271	6.19863	2.65007	5.76803	5.11327
9	75	141	142	86.1	180	63.6		21.9	42.4	37.5	43	27.8	16		3.42466	3.32547	3.78667	2.00233	6.47482	3.975
10	219	196	135	173	161	68.6		34.2	28.5	35.1	56.5	26.1	31.1		6.40351	6.87719	3.84615	3.06195	6.16858	2.20579
11	154	182	137	172	87.6	174		40.8	29.4	49.1	63.9	26.4	83.3		3.77451	6.19048	2.79022	2.69171	3.31818	2.08884
12	121	153	98.2	96.1	253	82.7		36.2	55.1	34.4	45.3	43	27.1		3.34254	2.77677	2.85465	2.12141	5.88372	3.05166
13	107	83.2	144	153	123	75.8		24.1	27.7	22.3	58.9	39.2	54.5		4.43983	3.00361	6.4574	2.59762	3.13776	1.39083
14	157	107	182	176	167	65.4		43.2	29.5	49.3	79.4	23.4	48.8		3.63426	3.62712	3.69168	2.21662	7.13675	1.34016
15	265	105	162	167	236	80		43.3	36.3	34.4	33	44.7	18.2		6.12009	2.89256	4.7093	5.06061	5.27964	4.3956
16	130	129	88.4	91.7	175	124		25.4	32.9	40.4	86.1	64.6	61.8		5.11811	3.92097	2.18812	1.06504	2.70898	2.00647
17	116	262	174	268	157	107		26.7	34.4	38.5	65	40.5	26.8		4.34457	7.61628	4.51948	4.12308	3.87654	3.99254
18	147	60.6	151	280	103	56.1		35.8	20.6	34.3	67.9	32.8	16.6		4.10615	2.94175	4.40233	4.12371	3.14024	3.37952
19	227	189	129	97.9	82.8	65.9		43.2	30.8	42.4	31	14.9	17.2		5.25463	6.13636	3.04245	3.15806	5.55705	3.8314
20	154	146	137	126	170	122		29	37.4	33.8	39	35.9	50.5		5.31034	3.90374	4.05325	3.23077	4.73538	2.41584
21	113	93.5	193	196	140	144		20.6	27.6	41.9	47.5	23.2	14.5		5.48544	3.38768	4.60621	4.12632	6.03448	9.93103
22	192	94.6	154	166	169	198		37.9	18.8	37.9	63.7	33.9	48.5		5.06596	5.03191	4.06332	2.60597	4.98525	4.08247
23	91.2	89.7	288	279	186	50.3		28.8	36.9	45.2	78.4	54.9	20.9		3.16667	2.43089	6.37168	3.55867	3.38798	2.4067
24	93.9	232	230	143	144	113		17.4	54.6	58.8	48.2	26.9	26.7		5.39655	4.24908	3.91156	2.9668	5.35316	4.23221
25	210	231	181	249	148	122		40.6	37.2	35.1	79.3	36.9	19.3		5.17241	6.20968	5.1567	3.13997	4.01084	6.32124
26	104	138	221	213	152	61.2		23.3	35	48.8	52.4	38.7	48.3		4.46352	3.94286	4.52869	4.06489	3.92765	1.26708
27	171	117	300	308	165	150		29.7	35.3	57.4	75.8	39.6	58.8		5.75758	3.31445	5.22648	4.06332	4.16667	2.55102
28	177	189	244	115	105	180		31.6	42.7	43.5	57.2	31.3	75.7		5.60127	4.42623	5.6092	2.01049	3.35463	2.37781
29	155	103	144	201	118	101		22.3	28.3	31.6	67.5	29.2	12.1		6.95067	3.63958	4.55696	2.97778	4.0411	8.34711
30	184	200	90.6	248	186	63.2		35.1	39.5	29.1	57.1	29.9	21.6		5.24217	5.06329	3.1134	4.34326	6.22074	2.92593
31	164	160	273	142	156	133		34.8	31.5	42.8	26.4	22.5	38.1		4.71264	5.07937	6.3785	5.37879	6.93333	3.49081
32	175	226	288	84.5	174	50.6		33.4	49.7	37.2	55.5	34.8	22.5		5.23952	4.54728	7.74194	1.52252	5	2.24889
33	112	201		427	140	48.5		25.9	49.9		77	56.3	31.7		4.32432	4.02806		5.54545	2.48668	1.52997
34	81.1	164		149	90.7	82.8		19.7	45		61	36	47		4.11675	3.64444		2.44262	2.51944	1.7617
35	210	107		159	82.9	105		53.1	31.2		69.9	15.4	29.5		3.9548	3.42949		2.27468	5.38312	3.55932
36	87.2	132		167	125	88.5		14.9	32.3		80.1	38.3	87.2		5.85235	4.08669		2.08489	3.26371	1.01491
37		158			168	198			39.5			29.9	49.9			4			5.61873	3.96794
38		203			79.7	60.3			32.6			13.5	40.3			6.22699			5.9037	1.49628
39		175			122				42.9			27.5				4.07925			4.43636
40		153			106				46.8			26.9				3.26923			3.94052
41		70.9			246				30.8			34.6				2.30195			7.10983
42		181			132				51.5			25.9				3.51456			5.09653
43		214			109				43.1			15				4.9652			7.26667
44		296							50.2							5.89641
45		163							40.6							4.01478
46		118							32.6							3.61963
average	154.372	152.926	175.913	183.842	150.016	107.613		32.7972	37.1761	39.0312	60.1194	32.1163	36.7211		4.77765	4.14426	4.55329	3.18876	4.97537	3.58343
sd	54.4157	55.99	57.0499	71.2823	41.6812	46.2875		9.66994	9.17887	7.86464	16.5954	10.7055	19.0693		1.17972	1.30352	1.30423	1.15305	1.52175	2.23113
n	36	46	32	36	43	41
	427	max with bis						94	max with bis						10.0676	max with bis
	427	max without bis						94	max without bis						9.1133	max without bis
	48.5	min with bis						12.1	min with bis						1.01491	min with bis
	60.6	min without bis						13.5	min without bis						1.06504	min without bis
Normalization for statistics:
	with bis
1	0.466314	0.326288	0.39498	0.466314	0.40819	0.220608		0.518926	0.483516	0.282051	1	0.257631	0.119658		0.3431	0.255392	0.509253	0.152299	0.563321	0.553703
2	0.268164	0.0972259	0.257596	0.34214	0.270806	0.0486129		0.227106	0.216117	0.225885	0.393162	0.365079	0.250305		0.427619	0.204085	0.414943	0.331742	0.285036	0.114578
3	0.36856	0.149273	0.231176	0.307794	0.331572	0.17041		0.272283	0.352869	0.361416	0.677656	0.136752	0.313797		0.491591	0.170786	0.248157	0.157514	0.712818	0.218114
4	0.239102	0.0457067	0.321004	0.450462	0.360634	0.265522		0.471306	0.15873	0.306471	0.487179	0.100122	0.032967		0.190741	0.177473	0.392701	0.353115	0.894587	1
5	0.173052	0.162483	0.46103	0.437252	0.228534	0.056539		0.202686	0.326007	0.271062	0.361416	0.277167	0.400488		0.326668	0.201062	0.60607	0.454782	0.316416	0.0598592
6	0.207398	0.553501	0.323646	0.162483	0.22325	0.365918		0.343101	0.336996	0.369963	0.864469	0.196581	0.286935		0.236869	0.60577	0.333395	0.0344641	0.408875	0.468139
7	0.704095	0.17041	0.18362	0.38177	0.257596	0.344782		0.307692	0.120879	0.311355	0.432234	0.180708	0.247863		0.820768	0.455276	0.23456	0.336724	0.487437	0.498172
8	0.154557	0.299868	0.350066	0.350066	0.357992	0.2893		0.233211	0.473748	0.208791	0.686203	0.241758	0.229548		0.266726	0.239466	0.572619	0.180628	0.525052	0.452724
9	0.0700132	0.244386	0.247028	0.0993395	0.347424	0.0398943		0.119658	0.369963	0.310134	0.377289	0.191697	0.047619		0.266192	0.255236	0.306182	0.109075	0.603128	0.326986
10	0.450462	0.389696	0.228534	0.32893	0.297226	0.0531044		0.269841	0.200244	0.28083	0.542125	0.17094	0.23199		0.595251	0.647576	0.312753	0.226126	0.569299	0.13155
11	0.278732	0.352708	0.233818	0.326288	0.103303	0.331572		0.350427	0.211233	0.45177	0.632479	0.174603	0.869353		0.304839	0.571718	0.19611	0.185227	0.254431	0.118631
12	0.191546	0.27609	0.131308	0.12576	0.540291	0.0903567		0.294261	0.525031	0.272283	0.405372	0.377289	0.18315		0.257121	0.194624	0.203227	0.12223	0.537832	0.224989
13	0.154557	0.0916777	0.252312	0.27609	0.19683	0.0721268		0.14652	0.190476	0.124542	0.571429	0.330891	0.517705		0.378334	0.219682	0.601204	0.174834	0.2345	0.0415256
14	0.286658	0.154557	0.352708	0.336856	0.313078	0.0446499		0.379731	0.212454	0.454212	0.821734	0.137973	0.448107		0.289346	0.288557	0.295689	0.132747	0.676248	0.0359293
15	0.571995	0.149273	0.299868	0.313078	0.495376	0.0832232		0.380952	0.295482	0.272283	0.255189	0.398046	0.0744811		0.563943	0.207415	0.4081	0.446907	0.471103	0.373448
16	0.215324	0.212682	0.105416	0.114135	0.334214	0.199472		0.162393	0.253968	0.345543	0.903541	0.641026	0.606838		0.453259	0.321018	0.129598	0.00553786	0.187135	0.109533
17	0.178336	0.564069	0.331572	0.579921	0.286658	0.154557		0.178266	0.272283	0.322344	0.64591	0.346764	0.179487		0.36781	0.729219	0.387132	0.343343	0.31611	0.328923
18	0.260238	0.0319683	0.270806	0.611625	0.143989	0.0200793		0.289377	0.103785	0.271062	0.681319	0.252747	0.0549451		0.341473	0.212848	0.374191	0.343413	0.234775	0.261206
19	0.471598	0.371202	0.212682	0.130515	0.0906209	0.0459709		0.379731	0.228327	0.369963	0.230769	0.034188	0.0622711		0.46834	0.56574	0.223972	0.236743	0.501746	0.311123
20	0.278732	0.257596	0.233818	0.204756	0.321004	0.194188		0.206349	0.308913	0.264957	0.328449	0.290598	0.468864		0.474494	0.319115	0.33563	0.244775	0.410981	0.154754
21	0.17041	0.11889	0.38177	0.389696	0.241744	0.252312		0.103785	0.189255	0.363858	0.432234	0.135531	0.029304		0.493836	0.262108	0.396712	0.343701	0.554486	0.984918
22	0.379128	0.121797	0.278732	0.310436	0.318362	0.39498		0.315018	0.0818071	0.315018	0.630037	0.266178	0.444444		0.447499	0.443738	0.336743	0.175756	0.438583	0.338858
23	0.112814	0.108851	0.632761	0.608983	0.363276	0.00475561		0.203907	0.302808	0.404151	0.809524	0.522589	0.107448		0.237694	0.156417	0.591735	0.280996	0.262141	0.153744
24	0.119947	0.484808	0.479524	0.24967	0.252312	0.17041		0.0647131	0.518926	0.570208	0.440781	0.180708	0.178266		0.484017	0.357263	0.319979	0.215616	0.479224	0.355398
25	0.426684	0.482166	0.350066	0.529723	0.26288	0.194188		0.347985	0.306471	0.28083	0.820513	0.302808	0.0879121		0.459258	0.573839	0.457522	0.234745	0.330945	0.586163
26	0.146631	0.23646	0.455746	0.43461	0.273448	0.0335535		0.136752	0.279609	0.448107	0.492063	0.324786	0.442002		0.38095	0.323435	0.388149	0.336915	0.321755	0.0278562
27	0.323646	0.180978	0.664465	0.685601	0.307794	0.268164		0.214896	0.283272	0.553114	0.777778	0.335775	0.570208		0.523898	0.254018	0.46523	0.336743	0.348158	0.169686
28	0.339498	0.371202	0.516513	0.175694	0.149273	0.347424		0.238095	0.373626	0.383394	0.550672	0.234432	0.776557		0.506631	0.376831	0.507507	0.109977	0.258457	0.150552
29	0.281374	0.143989	0.252312	0.402906	0.18362	0.138705		0.124542	0.197802	0.238095	0.676435	0.208791	0		0.655693	0.289933	0.391272	0.216828	0.334287	0.80995
30	0.357992	0.400264	0.111229	0.527081	0.363276	0.0388375		0.28083	0.334554	0.20757	0.549451	0.217338	0.115995		0.466963	0.447204	0.23181	0.367665	0.575061	0.2111
31	0.305152	0.294584	0.593131	0.247028	0.284016	0.22325		0.277167	0.236874	0.374847	0.174603	0.126984	0.31746		0.40847	0.448979	0.592488	0.482055	0.653778	0.2735
32	0.334214	0.468956	0.632761	0.0951123	0.331572	0.00554822		0.260073	0.459096	0.306471	0.529915	0.277167	0.126984		0.466671	0.390203	0.7431	0.0560735	0.440212	0.136311
33	0.167768	0.402906		1	0.241744	0		0.168498	0.461538		0.79243	0.539683	0.239316		0.365574	0.332847		0.500466	0.162579	0.056896
34	0.0861295	0.305152		0.265522	0.111493	0.0906209		0.0927961	0.401709		0.59707	0.291819	0.426129		0.342644	0.290471		0.157712	0.166198	0.0824944
35	0.426684	0.154557		0.291942	0.0908851	0.149273		0.500611	0.233211		0.705739	0.040293	0.212454		0.324755	0.266726		0.13916	0.482533	0.281068
36	0.102246	0.220608		0.313078	0.202114	0.10568		0.034188	0.246642		0.830281	0.319902	0.916972		0.534367	0.339323		0.118196	0.248413	0
37		0.2893			0.31572	0.39498			0.334554			0.217338	0.461538			0.329747			0.50856	0.326206
38		0.40819			0.0824306	0.0311757			0.250305			0.017094	0.344322			0.575752			0.54004	0.0531744
39		0.334214			0.194188				0.376068			0.188034				0.338502			0.37795
40		0.27609			0.151915				0.423687			0.180708				0.249023			0.323177
41		0.059181			0.521797				0.228327			0.274725				0.142173			0.673274
42		0.350066			0.220608				0.481074			0.168498				0.276124			0.450875
43		0.437252			0.159841				0.37851			0.035409				0.436368			0.690599
44		0.653897							0.465201							0.539234
45		0.30251							0.347985							0.33138
46		0.18362							0.250305							0.28773
	without bis
1	0.44869	0.304039	0.375	0.44869	0.388646			0.510559	0.474534	0.269565	1	0.24472			0.379689	0.281035	0.566577	0.165076	0.627392
2	0.243996	0.0674127	0.233079	0.320415	0.246725			0.213665	0.202484	0.212422	0.382609	0.354037			0.474755	0.223325	0.460497	0.366914	0.314378
3	0.347707	0.121179	0.205786	0.284934	0.309498			0.259627	0.341615	0.350311	0.67205	0.121739			0.546711	0.185871	0.272898	0.170942	0.795547
4	0.213974	0.0141921	0.298581	0.432314	0.33952			0.462112	0.144099	0.29441	0.478261	0.084472			0.208315	0.193393	0.435479	0.390954	1
5	0.145742	0.134825	0.443231	0.418668	0.203057			0.18882	0.314286	0.258385	0.350311	0.264596			0.361207	0.219925	0.675477	0.505308	0.349674
6	0.181223	0.538755	0.30131	0.134825	0.197598			0.331677	0.325466	0.359006	0.862112	0.182609			0.260201	0.67514	0.368773	0.0325361	0.453672
7	0.694323	0.143013	0.156659	0.361354	0.233079			0.295652	0.10559	0.299379	0.42236	0.16646			0.916968	0.505864	0.257603	0.372517	0.542039
8	0.126638	0.276747	0.328603	0.328603	0.33679			0.219876	0.464596	0.195031	0.680745	0.228571			0.293784	0.263122	0.637851	0.196941	0.584348
9	0.0393013	0.219432	0.222162	0.0695961	0.325873			0.104348	0.359006	0.298137	0.36646	0.17764			0.293183	0.28086	0.338163	0.116458	0.672168
10	0.432314	0.369541	0.203057	0.306769	0.274017			0.257143	0.186335	0.268323	0.534161	0.156522			0.663307	0.722163	0.345555	0.248117	0.634117
11	0.254913	0.331332	0.208515	0.304039	0.07369			0.33913	0.197516	0.442236	0.626087	0.160248			0.336653	0.636838	0.214355	0.202114	0.279954
12	0.164847	0.252183	0.10262	0.0968886	0.525109			0.281988	0.51677	0.259627	0.395031	0.36646			0.282981	0.212683	0.22236	0.131255	0.598723
13	0.126638	0.0616812	0.22762	0.252183	0.170306			0.131677	0.176398	0.109317	0.563975	0.319255			0.41932	0.240868	0.670003	0.190424	0.257536
14	0.2631	0.126638	0.331332	0.314956	0.290393			0.368944	0.198758	0.44472	0.818634	0.122981			0.319227	0.318339	0.326362	0.143085	0.754413
15	0.55786	0.121179	0.276747	0.290393	0.478712			0.370186	0.28323	0.259627	0.242236	0.387578			0.628093	0.22707	0.452801	0.496451	0.523666
16	0.18941	0.186681	0.0758734	0.0848799	0.312227			0.147826	0.240994	0.334161	0.901863	0.634783			0.503596	0.354851	0.139543	0	0.20426
17	0.151201	0.549672	0.309498	0.566048	0.2631			0.163975	0.259627	0.310559	0.639752	0.335404			0.407483	0.813994	0.429216	0.379962	0.34933
18	0.235808	0	0.246725	0.598799	0.115721			0.277019	0.0881988	0.258385	0.675776	0.239752			0.377859	0.233182	0.41466	0.380041	0.257845
19	0.454148	0.350437	0.186681	0.101801	0.0605895			0.368944	0.214907	0.359006	0.217391	0.0173913			0.520558	0.630114	0.245694	0.260059	0.558134
20	0.254913	0.233079	0.208515	0.178493	0.298581			0.192547	0.296894	0.252174	0.31677	0.278261			0.527481	0.35271	0.371287	0.269093	0.456041
21	0.143013	0.0897926	0.361354	0.369541	0.216703			0.0881988	0.175155	0.352795	0.42236	0.120497			0.549236	0.288589	0.439991	0.380365	0.617455
22	0.358624	0.0927948	0.254913	0.287664	0.295852			0.303106	0.0658385	0.303106	0.623602	0.253416			0.497116	0.492886	0.372538	0.191461	0.487088
23	0.0835153	0.0794214	0.620633	0.59607	0.342249			0.190062	0.290683	0.393789	0.806211	0.514286			0.261128	0.169708	0.659353	0.309835	0.288626
24	0.0908843	0.467795	0.462336	0.224891	0.22762			0.0484472	0.510559	0.562733	0.431056	0.16646			0.538192	0.395619	0.353682	0.236295	0.532801
25	0.407751	0.465066	0.328603	0.514192	0.238537			0.336646	0.29441	0.268323	0.817391	0.290683			0.510343	0.639223	0.50839	0.257812	0.366017
26	0.11845	0.211245	0.437773	0.415939	0.249454			0.121739	0.267081	0.438509	0.48323	0.313043			0.422263	0.35757	0.43036	0.372732	0.35568
27	0.30131	0.15393	0.653384	0.675218	0.284934			0.201242	0.270807	0.545342	0.773913	0.324224			0.58305	0.27949	0.517061	0.372538	0.385378
28	0.317686	0.350437	0.500546	0.148472	0.121179			0.224845	0.362733	0.372671	0.542857	0.221118			0.563628	0.417629	0.564613	0.117472	0.284483
29	0.257642	0.115721	0.22762	0.383188	0.156659			0.109317	0.183851	0.224845	0.670807	0.195031			0.731292	0.319887	0.433873	0.237658	0.369776
30	0.33679	0.380459	0.0818777	0.511463	0.342249			0.268323	0.322981	0.193789	0.541615	0.203727			0.51901	0.496784	0.25451	0.40732	0.640598
31	0.282205	0.271288	0.579694	0.222162	0.260371			0.264596	0.223602	0.363975	0.160248	0.111801			0.453216	0.498782	0.6602	0.535985	0.729138
32	0.312227	0.451419	0.620633	0.0652293	0.309498			0.247205	0.449689	0.29441	0.521739	0.264596			0.518681	0.43267	0.829607	0.0568423	0.488921
33	0.140284	0.383188		1	0.216703			0.154037	0.452174		0.78882	0.531677			0.404968	0.368156		0.556693	0.176639
34	0.0559498	0.282205		0.241266	0.0821507			0.0770186	0.391304		0.590062	0.279503			0.379176	0.320492		0.171165	0.18071
35	0.407751	0.126638		0.268559	0.0608624			0.491925	0.219876		0.700621	0.0236025			0.359054	0.293784		0.150298	0.536523
36	0.0725983	0.194869		0.290393	0.175764			0.0173913	0.23354		0.827329	0.308075			0.594825	0.375441		0.126717	0.273185
37		0.26583			0.293122				0.322981			0.203727				0.36467			0.565798
38		0.388646			0.0521288				0.237267			0				0.641375			0.601206
39		0.312227			0.167576				0.365217			0.173913				0.374517			0.418888
40		0.252183			0.123908				0.413665			0.16646				0.273872			0.35728
41		0.0281114			0.506004				0.214907			0.262112				0.153686			0.751067
42		0.328603			0.194869				0.47205			0.154037				0.304354			0.500914
43		0.418668			0.132096				0.367702			0.0186335				0.484596			0.770555
44		0.642467							0.455901							0.6003
45		0.279476							0.336646							0.366506
46		0.156659							0.237267							0.317409

## Sheet: Morphometry & crystallography
Nahsholim 2016	Long axis (μm)	Short axis (μm)	Long/short	eccentricity		Long axis (μm)	Mean	median	stdev	max	min		d13C (‰)		d18O (‰)		FWHM	asymmetry factor	d (Å)	%MgCO3
Mean	154.372	32.7972	4.77765	0.973524		Nahsholim 2017	150.016		41.6812	253	79.7		-1.159	0.03	0.363	0.033	0.1	2	2.997	13
median	152	32.5				Nahsholim 2016	154.372	152	54.4157	315	75		-1.242	0.03	-1.069	0.037	0.17	2.8	2.988	16
stdev	54.4157	9.66994	1.17972	0.0135745		Hadera 2016	152.926	153	55.99	296	60.6		-1.38	0.029	0.207	0.029	0.12	1.4	2.997	13
max	315	54.6	8.44504	0.992964		Hadera 2002	175.913	166	57.0499	300	88.4		-0.381	0.058	0.331	0.046	0.22	0.6	2.995	13.6667
min	75	14.9	2.74162	0.931106		Eilat 2017	183.842	172.5	71.2823	427	84.5		-0.253	0.019	0.334	0.032	0.27	0.56	2.991	15
						Bis	107.613	103	46.2875	198	48.5		0.251	0.031	0.01	0.044
Hadera 2016	Long axis (μm)	Short axis (μm)	Long/short	eccentricity
Mean	152.926	37.1761	4.14426	0.961583		Short axis (μm)	Mean		stdev	max	min
median	153	36.6				Nahsholim 2017	32.1163		10.7055	64.6	13.5
stdev	55.99	9.17887	1.30352	0.0217338		Nahsholim 2016	32.7972	32.5	9.66994	54.6	14.9
max	296	55.1	7.61628	0.991343		Hadera 2016	37.1761	36.6	9.17887	55.1	18.8
min	60.6	18.8	2.30195	0.900713		Hadera 2002	39.0312	37.55	7.86464	58.8	22.3
						Eilat 2017	60.1194	59.95	16.5954	94	26.4
Hadera 2002	Long axis (μm)	Short axis (μm)	Long/short	eccentricity		Bis	36.7211	32.05	19.0693	87.2	12.1
Mean	175.913	39.0312	4.55329	0.968273		Long/short	Mean		stdev	max	min
median	166	37.55				nahsholim 2018	4.63		1.5
stdev	57.0499	7.86464	1.30423	0.0211804		Nahsholim 2017	4.97537		1.52175	9.1133	2.48668
max	300	58.8	7.74194	0.991623		Nahsholim 2016	4.77765		1.17972	8.44504	2.74162
min	88.4	22.3	2.18812	0.88946		Hadera 2016	4.14426		1.30352	7.61628	2.30195
						Hadera 2002	4.55329		1.30423	7.74194	2.18812
Eilat 2017	Long axis (μm)	Short axis (μm)	Long/short	eccentricity		Eilat 2017	3.18876		1.15305	5.54545	1.06504
Mean	183.842	60.1194	3.18876	0.910211		Bis	3.58343		2.23113	10.0676	1.01491
median	172.5	59.95				eccentricity	Mean		stdev	max	min
stdev	71.2823	16.5954	1.15305	0.116974		Nahsholim 2017	0.972356		0.0191768	0.993961	0.915577
max	427	94	5.54545	0.983607		Nahsholim 2016	0.973524		0.0135745	0.992964	0.931106
min	84.5	26.4	1.06504	0.344105		Hadera 2016	0.961583		0.0217338	0.991343	0.900713
						Hadera 2002	0.968273		0.0211804	0.991623	0.88946
Bis	Long axis (μm)	Short axis (μm)	Long/short	eccentricity		Eilat 2017	0.910211		0.116974	0.983607	0.344105
Mean	107.613	36.7211	3.58343	0.886173		Bis	0.886173		0.154705	0.995055	0.170771
median	103	32.05
stdev	46.2875	19.0693	2.23113	0.154705
max	198	87.2	10.0676	0.995055
min	48.5	12.1	1.01491	0.170771
Nahsholim 2016	Long axis (μm)	Short axis (μm)	Long/short	eccentricity
Mean	150.016	32.1163	4.97537	0.972356
stdev	41.6812	10.7055	1.52175	0.0191768
max	253	64.6	9.1133	0.993961
min	79.7	13.5	2.48668	0.915577

## Sheet: Warts count
		Nahsholim 2016					Nahsholim 2017					Hadera 2016					Hadera 2002					Eilat 2017
		length (μm)	count	density (#/μm)			length (μm)	count	density (#/μm)			length (μm)	count	density (#/μm)			length (μm)	count	density (#/μm)			length (μm)	count	density (#/μm)
1	pic 4, 1	141	6	0.0425532		pic 3, 7	122	5	0.0409836		pic 12, 1	172	8	0.0465116		pic 2, 1	288	13	0.0451389		pic 2, 1	279	15	0.0537634
2	pic 4, 3	177	8	0.0451977		pic 3, 9	106	6	0.0566038		pic 12, 3	85.3	5	0.0586166		pic 2, 3	230	10	0.0434783		pic 2, 3	143	9	0.0629371
3	pic 4, 5	155	7	0.0451613		pic 3, 3	168	10	0.0595238		pic 12, 5	105	5	0.047619		pic 2, 5	181	8	0.0441989		pic 2, 5	249	12	0.0481928
4	pic 4, 7	184	9	0.048913		pic 3, 5	79.7	4	0.0501882		pic 12, 7	65.8	3	0.0455927		pic 5, 1	170	11	0.0647059		pic 2, 7	213	14	0.0657277
5	pic 4, 9	164	7	0.0426829		pic 3, 1	125	6	0.048		pic 12, 9	110	6	0.0545455		pic 5, 3	223	11	0.0493274		pic 2, 9	308	18	0.0584416
6	pic 5, 1	227	10	0.0440529		pic 5, 11	156	9	0.0576923		pic 12, 11	258	11	0.0426357		pic 5, 5	171	10	0.0584795		pic 2, 11	115	8	0.0695652
7	pic 5, 3	154	8	0.0519481		pic 5, 3	165	7	0.0424242		pic 12, 13	113	5	0.0442478		pic 5, 7	118	6	0.0508475		pic 2, 13	201	12	0.0597015
8	pic 5, 5	113	5	0.0442478		pic 5, 1	154	7	0.0454545		pic 12, 15	162	8	0.0493827		pic 5, 9	181	7	0.038674		pic 2, 15	248	13	0.0524194
9	pic 5, 7	192	11	0.0572917		pic 5, 5	105	5	0.047619		pic 12, 17	141	6	0.0425532		pic 5, 11	142	6	0.0422535		pic 2, 17	142	8	0.056338
10	pic 5, 9	91.2	4	0.0438596		pic 5, 13	174	8	0.045977		pic 12, 19	196	11	0.0561224		pic 5, 13	135	7	0.0518519		pic 2, 19	84.5	5	0.0591716
11	pic 5, 13	210	10	0.047619		pic 5, 9	186	8	0.0430108		pic 10, 1	182	10	0.0549451		pic 10, tr	210	11	0.052381		pic 4, 1	268	12	0.0447761
12	pic 8, 1	147	7	0.047619		pic 5, 7	118	6	0.0508475		pic 10, 3	153	7	0.0457516		pic 10, tl	190	11	0.0578947		pic 4, 3	280	14	0.05
13	pic 10, 1	265	13	0.0490566		pic 5, 17	90.7	4	0.0441014		pic 10, 5	83.2	5	0.0600962		pic 9, 1	221	10	0.0452489		pic 4, 5	97.9	4	0.040858
14	pic 10, 3	130	6	0.0461538		pic 5, 19	82.9	5	0.0603136		pic 10, 7	107	7	0.0654206		pic 9, 3	300	13	0.0433333		pic 4, 7	126	6	0.047619
15	pic 10, 5	116	8	0.0689655		pic 8, 5	168	11	0.0654762		pic 10, 9	105	6	0.0571429		pic 4, 1	137	6	0.0437956		pic 4, 9	196	11	0.0561224
16	pic 11, 1	121	6	0.0495868		pic 8, 11	157	9	0.0573248		pic 10, 11	129	6	0.0465116		pic 4, 3	98.2	4	0.0407332		pic 4, 11	166	10	0.060241
17	pic 11, 3	107	5	0.046729		pic 8, 17	170	7	0.0411765		pic 10, 13	262	12	0.0458015		pic 4, 7	182	8	0.043956		pic 6, 1	167	17	0.101796
18	pic 11, 5	157	8	0.0509554		pic 8, 3	123	7	0.0569106		pic 10, 15	60.6	3	0.049505		pic 4, 9	162	8	0.0493827		pic 6, 3	91.7	7	0.0763359
19	pic 12, 1	219	11	0.0502283		pic 8, 1	253	13	0.0513834		pic 9, 1	189	10	0.0529101		pic 4, 11	88.4	4	0.0452489		pic 8	176	10	0.0568182
20	pic 12, 3	154	7	0.0454545		pic 1, 1	246	11	0.0447154		pic 9, 3	146	7	0.0479452		pic 8, 1	244	11	0.045082		pic 12, 1	427	15	0.0351288
21	pic 14, 1	315	16	0.0507937		pic 10, 9	135	7	0.0518519		pic 9, 5	93.5	5	0.0534759		pic 8, 7	273	11	0.040293		pic 12, 3	149	7	0.0469799
22	pic 14, 3	107	7	0.0654206		pic 10, 7	185	11	0.0594595		pic 9, 7	94.6	5	0.0528541		pic 8, 9	288	14	0.0486111		pic 12, 5	159	9	0.0566038
23	pic 14, 5	75	4	0.0533333		pic 10, 1	203	12	0.0591133		pic 9, 9	89.7	4	0.0445931							pic 12, 7	167	9	0.0538922
24	pic 15, 1	157	8	0.0509554		pic 10, 3	151	9	0.0596026		pic 6, 1	232	9	0.0387931
25	pic 17, 1	150	8	0.0533333		pic 10, 11	133	6	0.0451128		pic 6, 3	231	11	0.047619
26	pic 17, 3	188	9	0.0478723		pic 10, 13	146	7	0.0479452		pic 6, 5	138	6	0.0434783
27	pic 17, 5	139	7	0.0503597		pic 12, 3	180	10	0.0555556		pic 6, 7	117	5	0.042735
28	pic 18, 1	225	11	0.0488889		pic 12, 1	184	8	0.0434783		pic 6, 9	189	9	0.047619
29	pic 16, 1	114	6	0.0526316		pic 12, 7	87.6	5	0.0570776		pic 6, 11	103	6	0.0582524
30	pic 20, 7	210	8	0.0380952		pic 12, 5	161	8	0.0496894
			mean	0.049332				mean	0.0512871				mean	0.0497682				mean	0.0474962				mean	0.0571056
			std	0.00627445				std	0.00691884				std	0.0063725				std	0.00648131				std	0.0133486
			n	30				n	30				n	29				n	22				n	23
statistics:
without bis
Component 1 :
Df R Sum Sq R Mean Sq Iter Pr(Prob)
Site1 4 0.0012560 3.1401e-04 5000 < 2.2e-16 ***
Residuals 129 0.0084692 6.5653e-05
---
Signif. codes: 0 ‘***’ 0.001 ‘**’ 0.01 ‘*’ 0.05 ‘.’ 0.1 ‘ ’ 1
Comparison Stat p.value p.adjust
1 Ei - Ha02 = 0 2.797 0.005161 0.04087
2 Ei - Ha16 = 0 2.475 0.01331 0.04437
3 Ei - Na16 = 0 2.645 0.008174 0.04087
4 Ei - Na17 = 0 1.997 0.04586 0.10300
5 Ha02 - Ha16 = 0 -1.245 0.2132 0.35530
6 Ha02 - Na16 = 0 -1.027 0.3042 0.38030
7 Ha02 - Na17 = 0 -1.947 0.05148 0.10300
8 Ha16 - Na16 = 0 0.267 0.7894 0.78940
9 Ha16 - Na17 = 0 -0.8781 0.3799 0.42210
10 Na16 - Na17 = 0 -1.143 0.2529 0.36130
